# Supplementary material for: The GBA variant E326K is associated with alpha-synuclein aggregation and lipid droplet accumulation in human cell lines
Source: PubMed Central journal article supplement (PMC9941838; doi:10.1093/hmg/ddac233), 2022-09-20
Supplement: supplementary_figures_smith_2022_ddac233.pdf [file supplementary_figures_smith_2022_ddac233.pdf]

## Legends to Figures

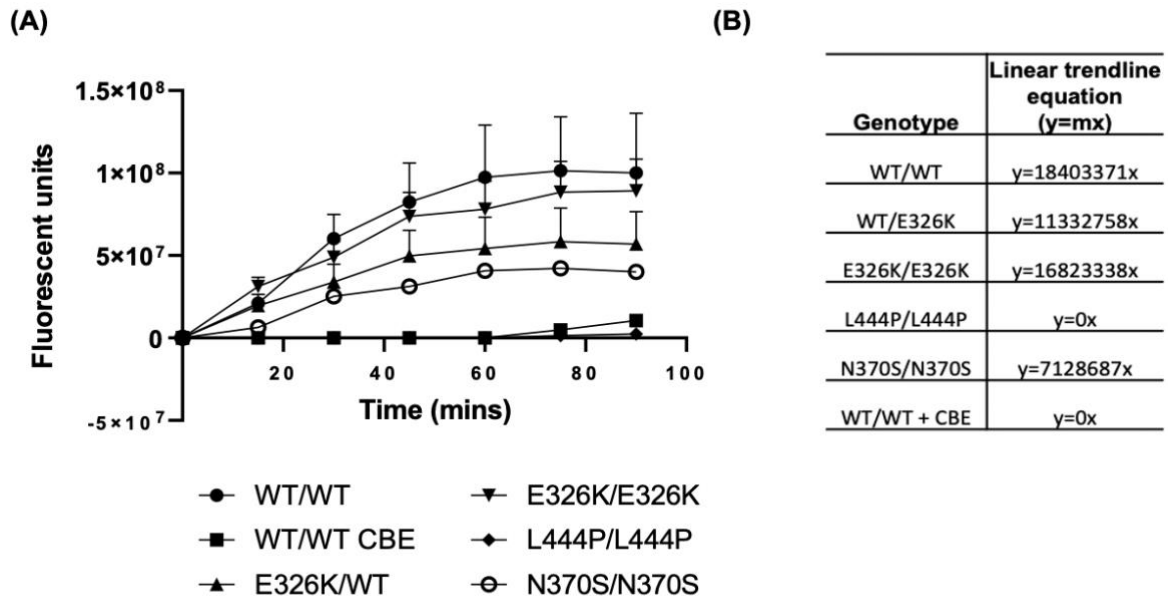

### Supplementary Figure 1. Activity of lysosomal GCase in patient fibroblast lines.

(A) Fibroblast cell lines were incubated with PFB-FDGluc substrate for 1 hour at 37°C. Following washing, fluorescence was measured every 15 minutes for 90 minutes. (B) The initial linear rate of each reaction was calculated between time 0 and time 45 minutes and initial rate equations displayed in the table. The  $n$  for each genotype per experiment was WT/WT  $n=3$ ; E326K/WT  $n=1$ ; E326K/E326K  $n=1$ ; L444P/L444P  $n=2$ ; N370S/N370S  $n=1$ . Statistical test used was one way ANOVA with Tukey post-hoc analysis. Activity at 45 minutes: WT/WT vs. L444P/L444P \*\*\* $p<0.001$ ; WT/WT vs. WT/WT + CBE \*\* $p<0.01$ ; E326K/E326K vs. L444P/L444P \* $p<0.05$ . Raw data can be found at: <https://doi.org/10.5281/zenodo.6985167>
