# Supplementary material for: The GBA variant E326K is associated with alpha-synuclein aggregation and lipid droplet accumulation in human cell lines
Source: PubMed Central journal article supplement (PMC9941838; doi:10.1093/hmg/ddac233), 2022-09-20
Supplement: supplementary_tables_smith_2022_ddac233.pdf [file supplementary_tables_smith_2022_ddac233.pdf]

## Legends to Tables

**Supplementary Table 1. Characteristics of fibroblast cell lines.** For fibroblast analysis cell lines used were: UCL-CTRL001, UCL-CTRL002, UCL-CTRL003, 7301, UCL-YCTRL001, UCL-E001K, ND41016, GM10905, GM20272, UCL-N001S and UCL-N002S.

| Cell line    | GBA genotype | Phenotype  | Gender | Age   |
|--------------|--------------|------------|--------|-------|
| UCL-CTRL001  | WT/WT        | Unaffected | F      | 58    |
| UCL-CTRL002  | WT/WT        | Unaffected | M      | 53    |
| UCL-CTRL003  | WT/WT        | Unaffected | F      | 73    |
| 7301         | WT/WT        | Unaffected | F      | 14    |
| UCL-YCTRL001 | WT/WT        | Unaffected | M      | 1     |
| UCL-E001K    | WT/E326K     | PD         | M      | 50    |
| ND41016      | E326K/E326K  | PD         | M      | 52    |
| GM10905      | L444P/L444P  | Type I GD  | M      | 7     |
| GM20272      | L444P/L444P  | Type II GD | M      | Child |
| UCL-N001S    | N370S/N370S  | GD         | F      | 58    |
| UCL-N002S    | N370S/N370S  | GD         | M      | 76    |
